# Supplementary material
Source: publisher figshare collection journal article supplement (https://acs.figshare.com/ndownloader/files/5122750)
Supplement: Supplementary file 1 [file 5122750]

From  
Dr. A. Gnanamani  
CHORD  
Central Leather Research Institute  
Adyar, Chennai  
Tamil Nadu  
India  
Email: [agmani\\_2000@yahoo.com](mailto:agmani_2000@yahoo.com)

25/04/05

Dear Editor,

Please find enclosed with the research article entitled “ANTI-CARIOGENIC PROPERTIES OF *Psidium guajava* Linn. ON *Streptococcus mutans*” submitted for publication in your esteemed Journal “Journal of Agricultural and Food Chemistry”. The article is prepared as per the instructions provided. Followed by the text and references, tables and figures are enclosed. No colour figures are enclosed.

Regarding the significance of the article, in the present study, the effect of the plant extract on clinical strains was carried out and the results are compared with the type strains. It has been understood that, the chosen plant has significant effect in reducing the cariogenic properties of both the clinical as well as type strains of *Streptococcus mutans*. The results are highly comparable. Hope, to our knowledge, this will be first kind of report for the clinical strains.

Kindly acknowledge the receipt of the mail.

With regards

Dr. A. Gnanamani

## *Reviewers List*

1. Dr. E. Benjavongkulchai  
Department of Biochemistry  
Faculty of Dentistry  
Chulalongkorn University,  
Henri-Dunant Road  
Bangkok 10330, Thailand  
Tel: +66-2-2188673  
Fax: +66-2-2553058  
Email: [Em-on.B@chula.ac.th](mailto:Em-on.B@chula.ac.th)
  
2. Dr. Zubaidah Haji Abd Rahim  
Department of Oral Biology  
Faculty of Dentistry  
University of Malaya  
Kuala Lumpur, Malaysia  
Tel: + 60 -3-79674851  
Fax: +60-3-79674536  
Email: [zubaidar@um.edu.my](mailto:zubaidar@um.edu.my)
  
3. Dr. Akio Yanagida  
Department of Analytical Chemistry  
School of Pharmacy  
Tokyo University of Pharmacy and Life Science  
1432-1 Horinouchi, Hachioji  
Tokyo 192- 0392, Japan.  
Tel: +81-426-76-4546  
Fax: +81-426-76-4542  
Email: [yanagida@ps.toyaku.ac.jp](mailto:yanagida@ps.toyaku.ac.jp)
  
4. Dr. Paula B. Andrade  
REQUIMTE/Servico de Farmacognosia  
Faculdade de Farmacia  
Universidade do Porto,  
R. Anibal Cunha 164,  
4050-047, Porto, Portugal.  
Tel: + 351-222078935  
Fax: +351-222003977  
Email: [pandrade@ff.up.pt](mailto:pandrade@ff.up.pt)
